# Supplementary material
Source: MDPI journal article supplement (https://www.mdpi.com/2673-9992/14/1/124)
Supplement: s1 [file s1]

# Molecular docking studies of antimalarial compounds from extract of *Cecropia obtusifolia*.

Yolotl Moreno-Hernández<sup>1</sup>, Zandy Evelyn Olivo-Vidal<sup>2\*</sup> and Carlos Alberto Lobato-Tapia<sup>3</sup>

<sup>1</sup> Departamento de Salud, El Colegio de la Frontera Sur Unidad Villahermosa, Carretera Villahermosa – Reforma, Km. 15.5 Ra. Guineo Segunda sección. Villahermosa, Tabasco. México C.P. 8628

<sup>2\*</sup> Departamento de Salud, El Colegio de la Frontera Sur Unidad Villahermosa, Carretera Villahermosa – Reforma, Km. 15.5 Ra. Guineo Segunda sección. Villahermosa, Tabasco. México C.P. 8628; ozendy@ecosur.mx; Tel.

(993) 3136110 Ext. 3402

<sup>3</sup> Departamento de Ciencias Químico-Biológicas, Universidad de las Américas Puebla. Ex Hacienda Sta. Catarina Mártir S/N. San Andrés Cholula, Puebla. México C.P. 72810

## Introduction

Malaria is a disease that affect many people in the world. In México, malaria still a disease with active zones especially in the states of Chiapas and southern Chihuahua where several communities are affected year after year. According to previous studies, a moderate antimalarial effect has been attributed of some *Cecropia* species in countries like Brazil, Panama and Colombia. To date in México, it doesn't exist studies have been evaluations of the possible antimalarial activity of *Cecropia Obtusifolia* Bertol.

**Objective** identify the main metabolites present in acetonc extract of *C. Obtusifolia* and evaluate their possible antimalarial activity *in silico* analysis.

## Methods

An acetonc extraction of *C. Obtusifolia* leaves was carried out and by means of Thin Layer Chromatography (TLC) and HPLC the main compounds were identified. This compounds were evaluated with specific molecular docking studies using four different malaria targets with PDB codes 1CET, 1PZ4, 2BL9 and 4ZL4 using AutodockVina and visualized using LigPlot+ and PyMOL.

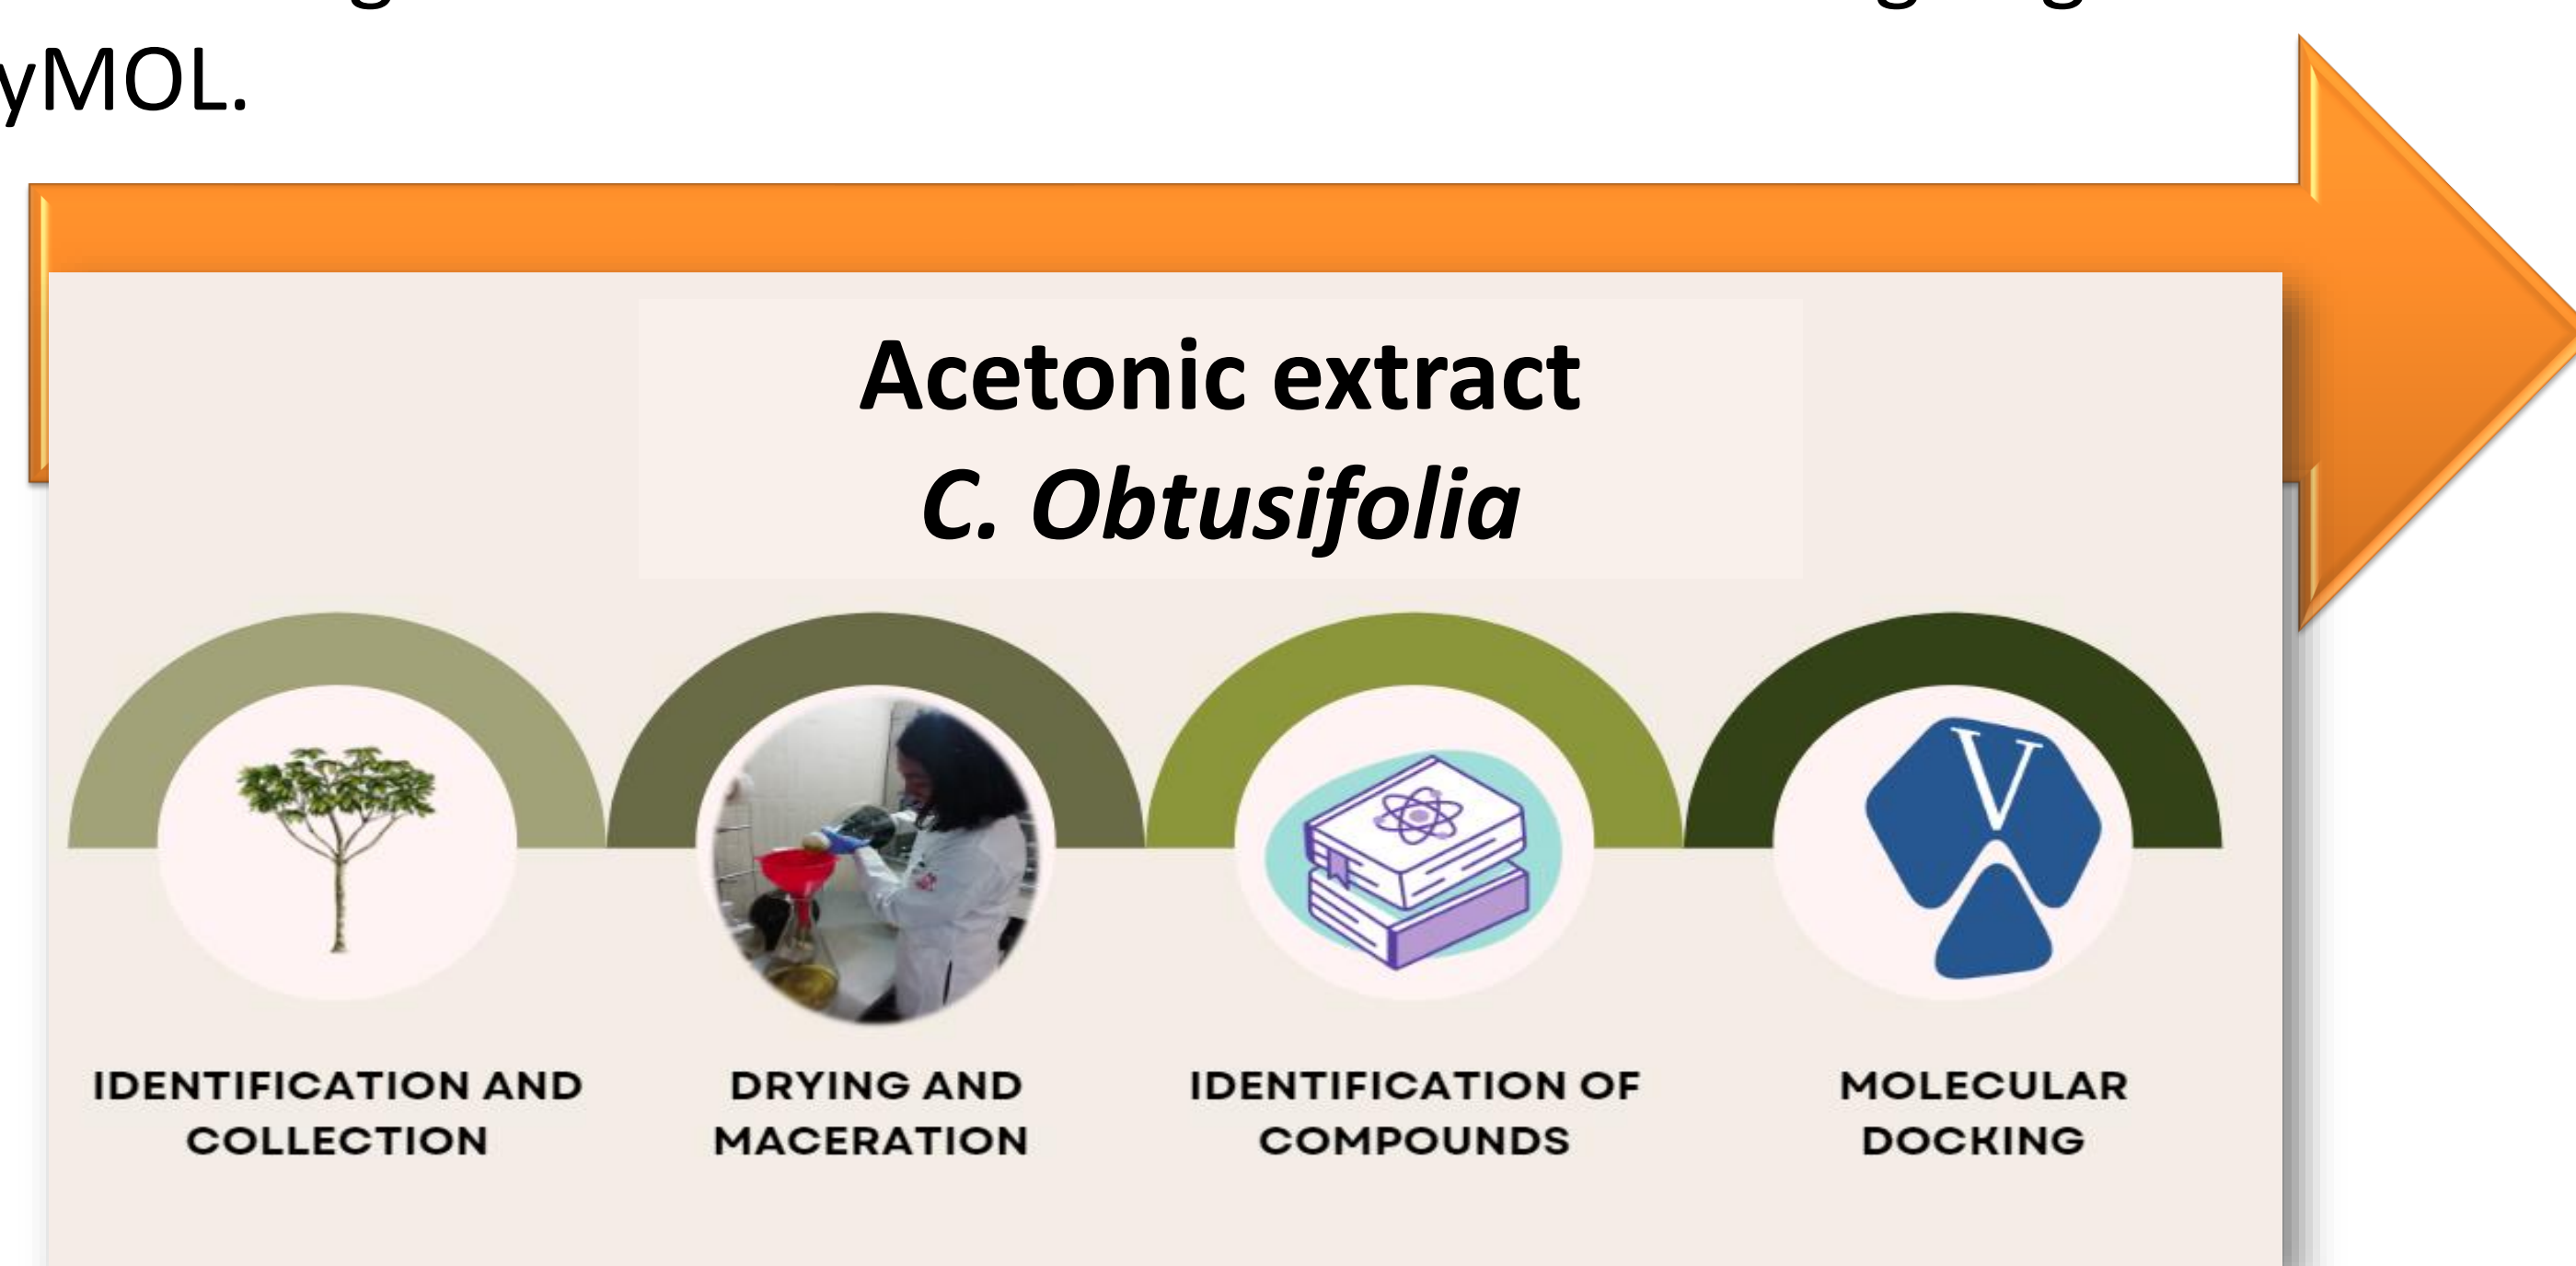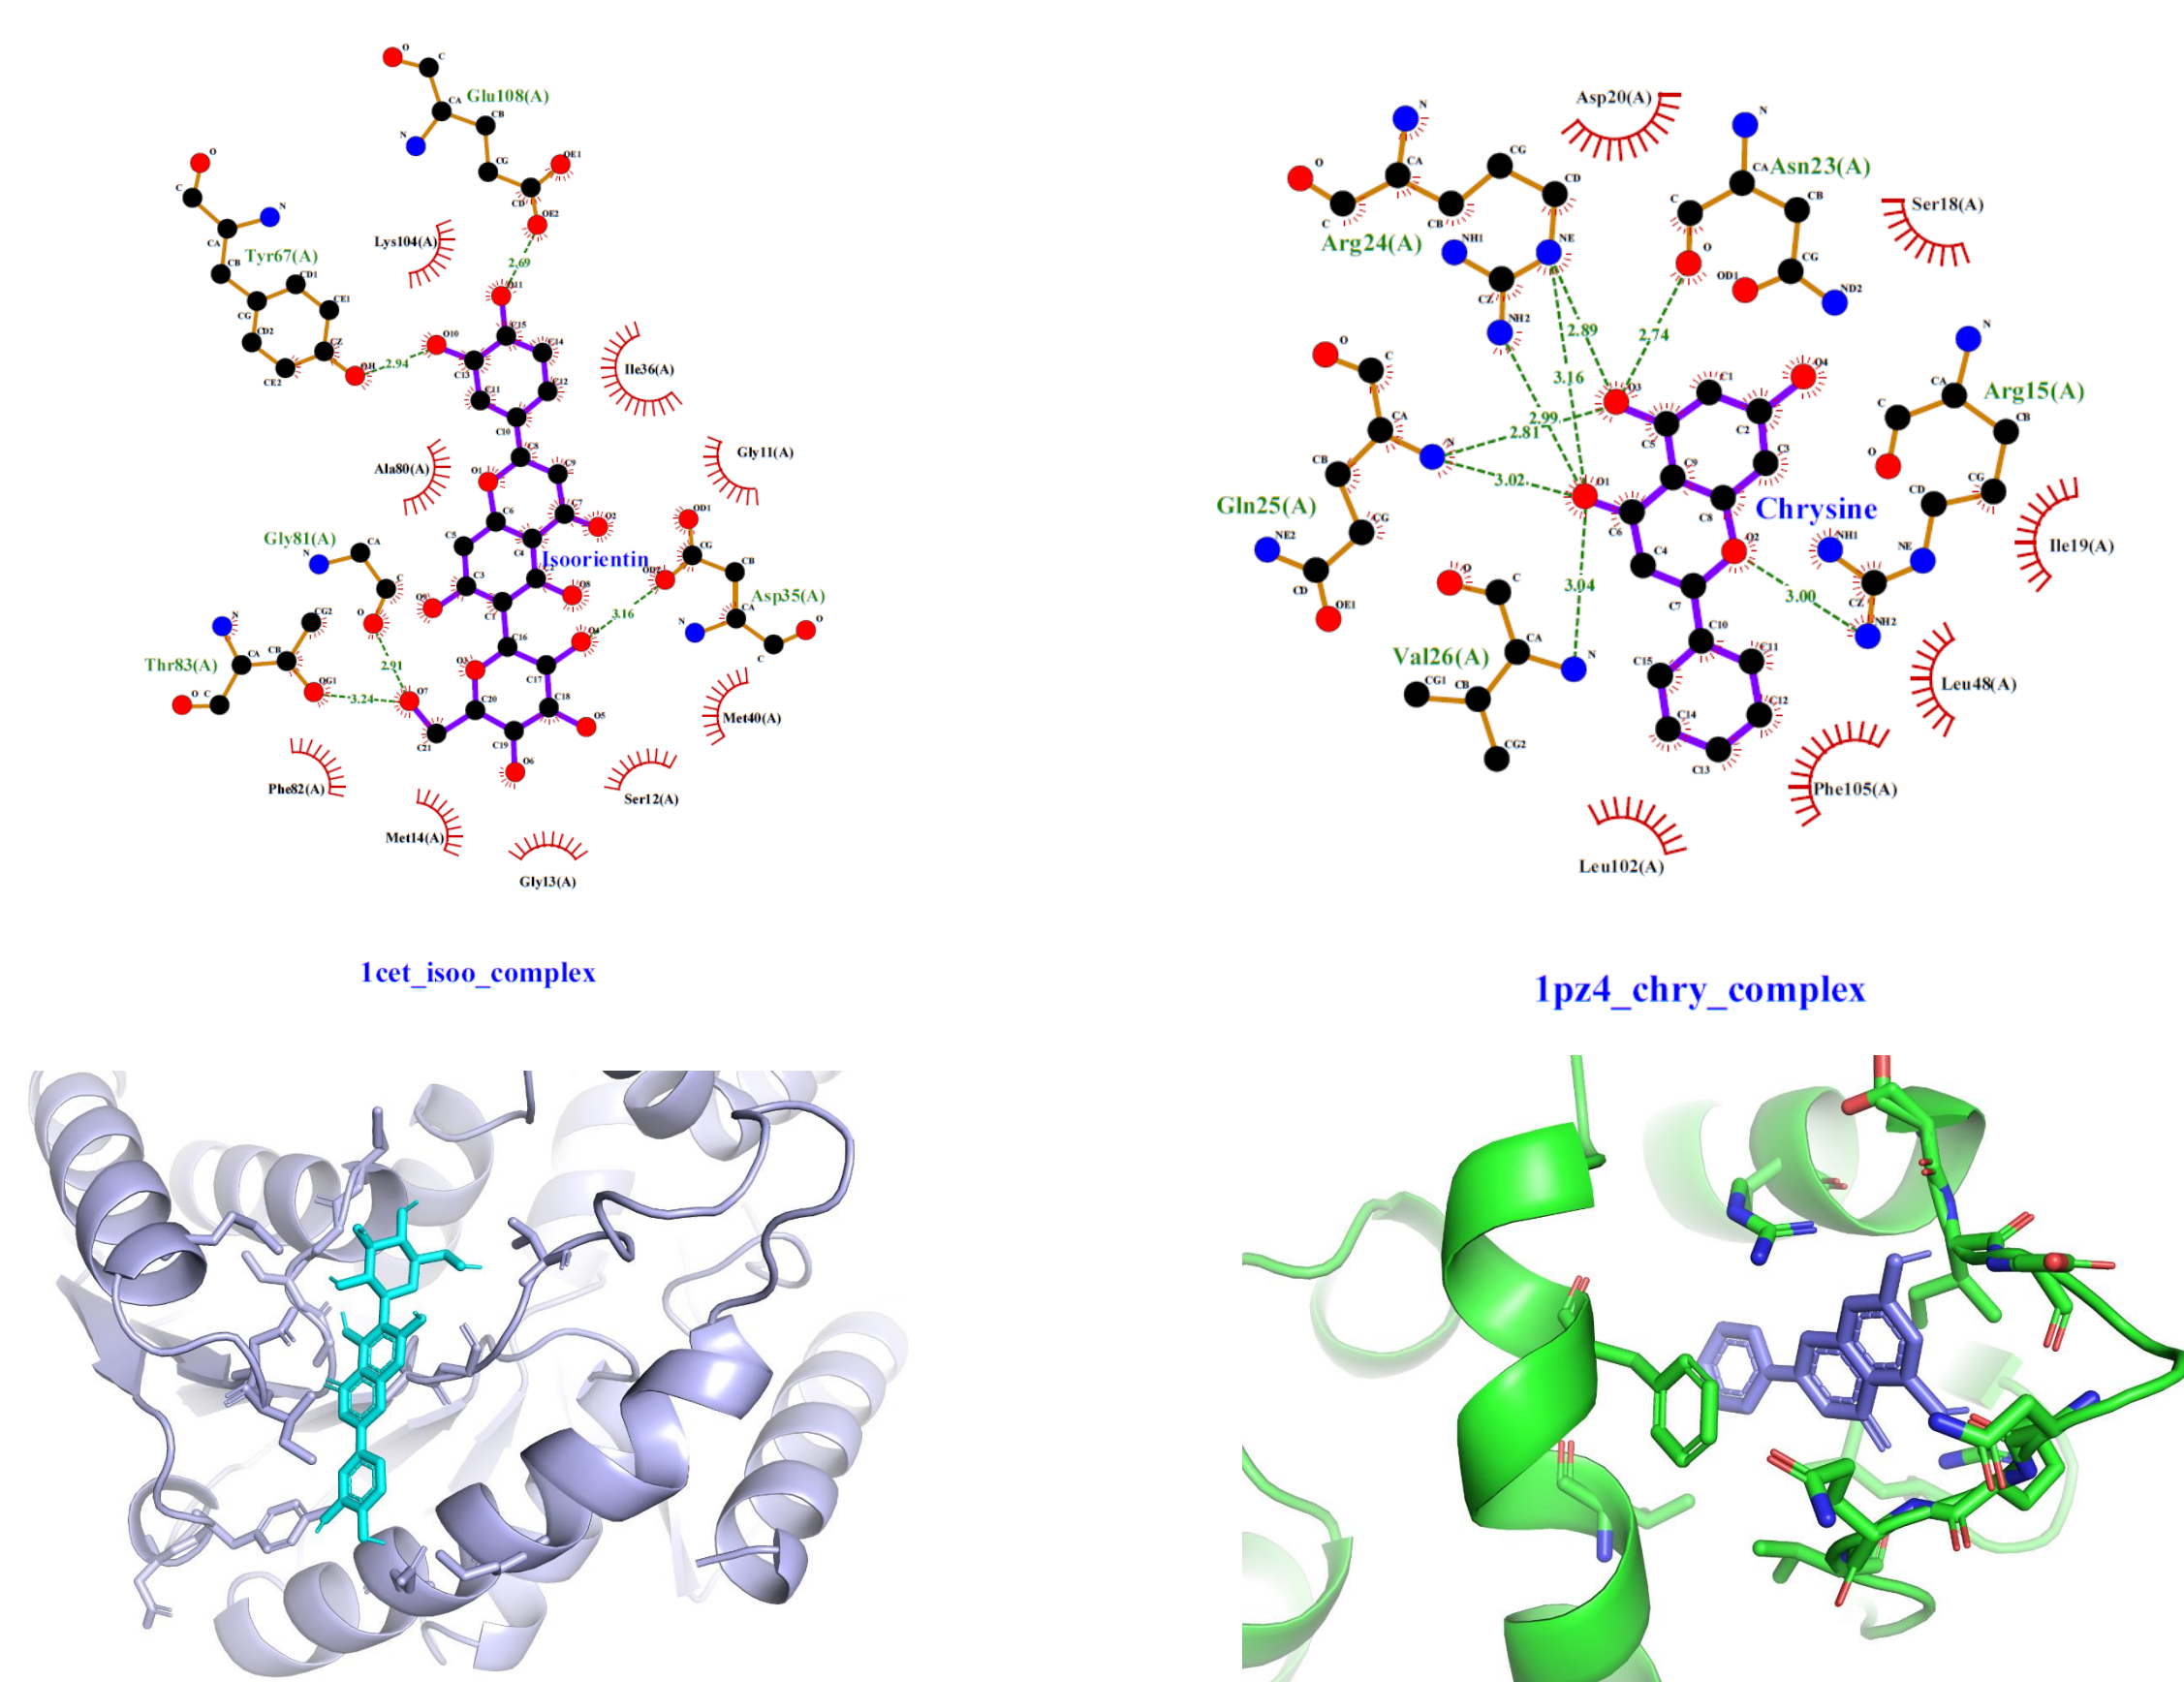

Molecular docking results (kcal/mol)

|                   | 1CET | 1PZ4 | 2BL9 | 4ZL4 |
|-------------------|------|------|------|------|
| $\alpha$ - amyrin | -7.9 | -6.0 | -7.9 | -8.2 |
| Chrysine          | -7.8 | -9.6 | -8.7 | -9.6 |
| Isoorientin       | -9.1 | -7.0 | -8.6 | -8.3 |
| Ursolic acid      | -7.7 | -6.5 | -7.8 | -7.8 |
| Chloroquine       | -6.3 |      |      |      |
| Fatty acid (16C)  |      | -6.9 |      |      |
| Pyrimethamine     |      |      | -7.6 |      |
| WEHI-842          |      |      |      | -8.2 |

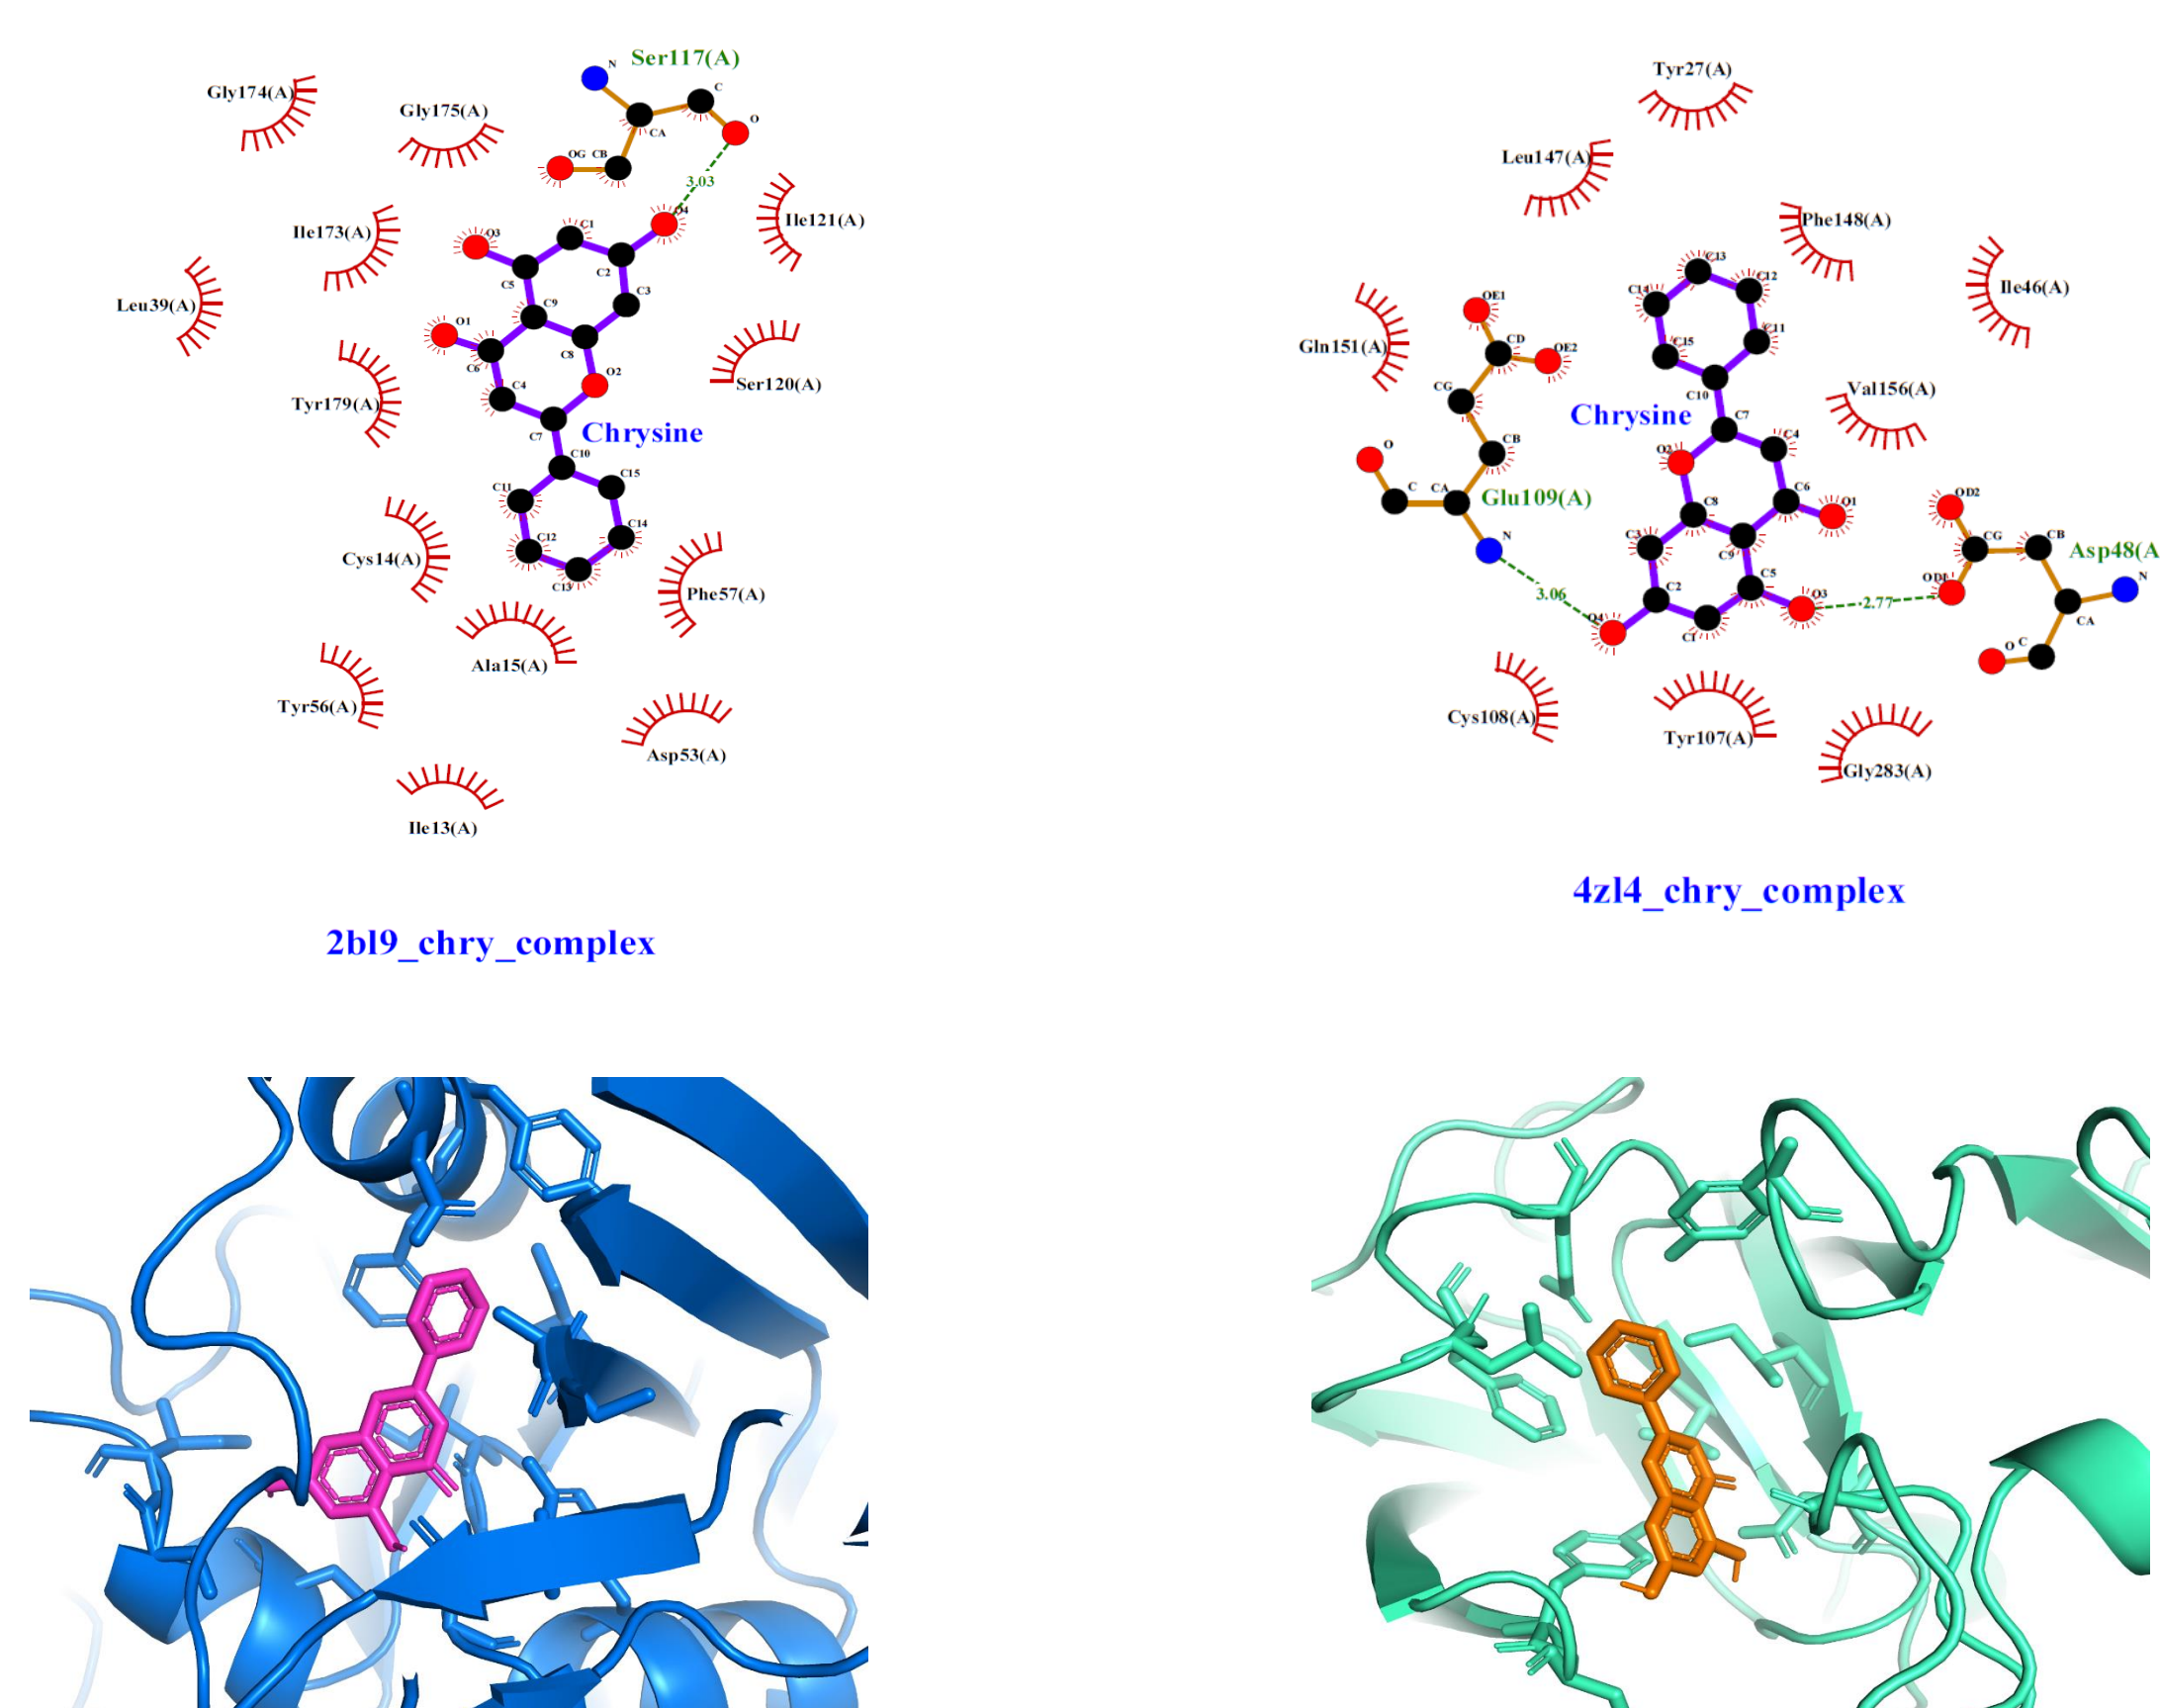

## Results

The docking studies showed that the ligands docked well with the targets, resulting in the next strongest binding energies between ligands and targets (kcal/mol): isoorientin-1CET (-9.1), chrysine-1PZ4 (-9.6 kcal/mol), chrysine-2BL9 (-8.7) and chrysine-4ZL4 (-9.6).

## Conclusions

These binding affinities were stronger than the control ligands. Analysis of the results suggests that isoorientin and chrysine could act as an anti-malaria agent.

## References

- Boletín Epidemiológico. (2021). SINAVE México. [Consultado en 2022].
- Rivera-Mondragón A. et al. (2019) Phytochem. Lett, 31, pp. 118-120.
- Pettersen EF, et al. (2004) Comput Chem. Oct;25(13):1605-12.
- Eberhardt, J. et al. (2021) J Chem Inf Model. 61(8):3891-3898.
- Schrödinger, L., & DeLano, W. (2020). PyMOL.
- Wallace AC, et al. (1996) Protein Eng. 8: 127-134.

ECMC  
2022

The 8th International Electronic  
Conference on Medicinal Chemistry  
01–30 NOVEMBER 2022 | ONLINE
